# Supplementary material for: Dated tribe-wide whole chloroplast genome phylogeny indicates recurrent hybridizations within Triticeae
Source: PubMed Central journal article supplement (PMC5474006; doi:10.1186/s12862-017-0989-9), 2017-06-16

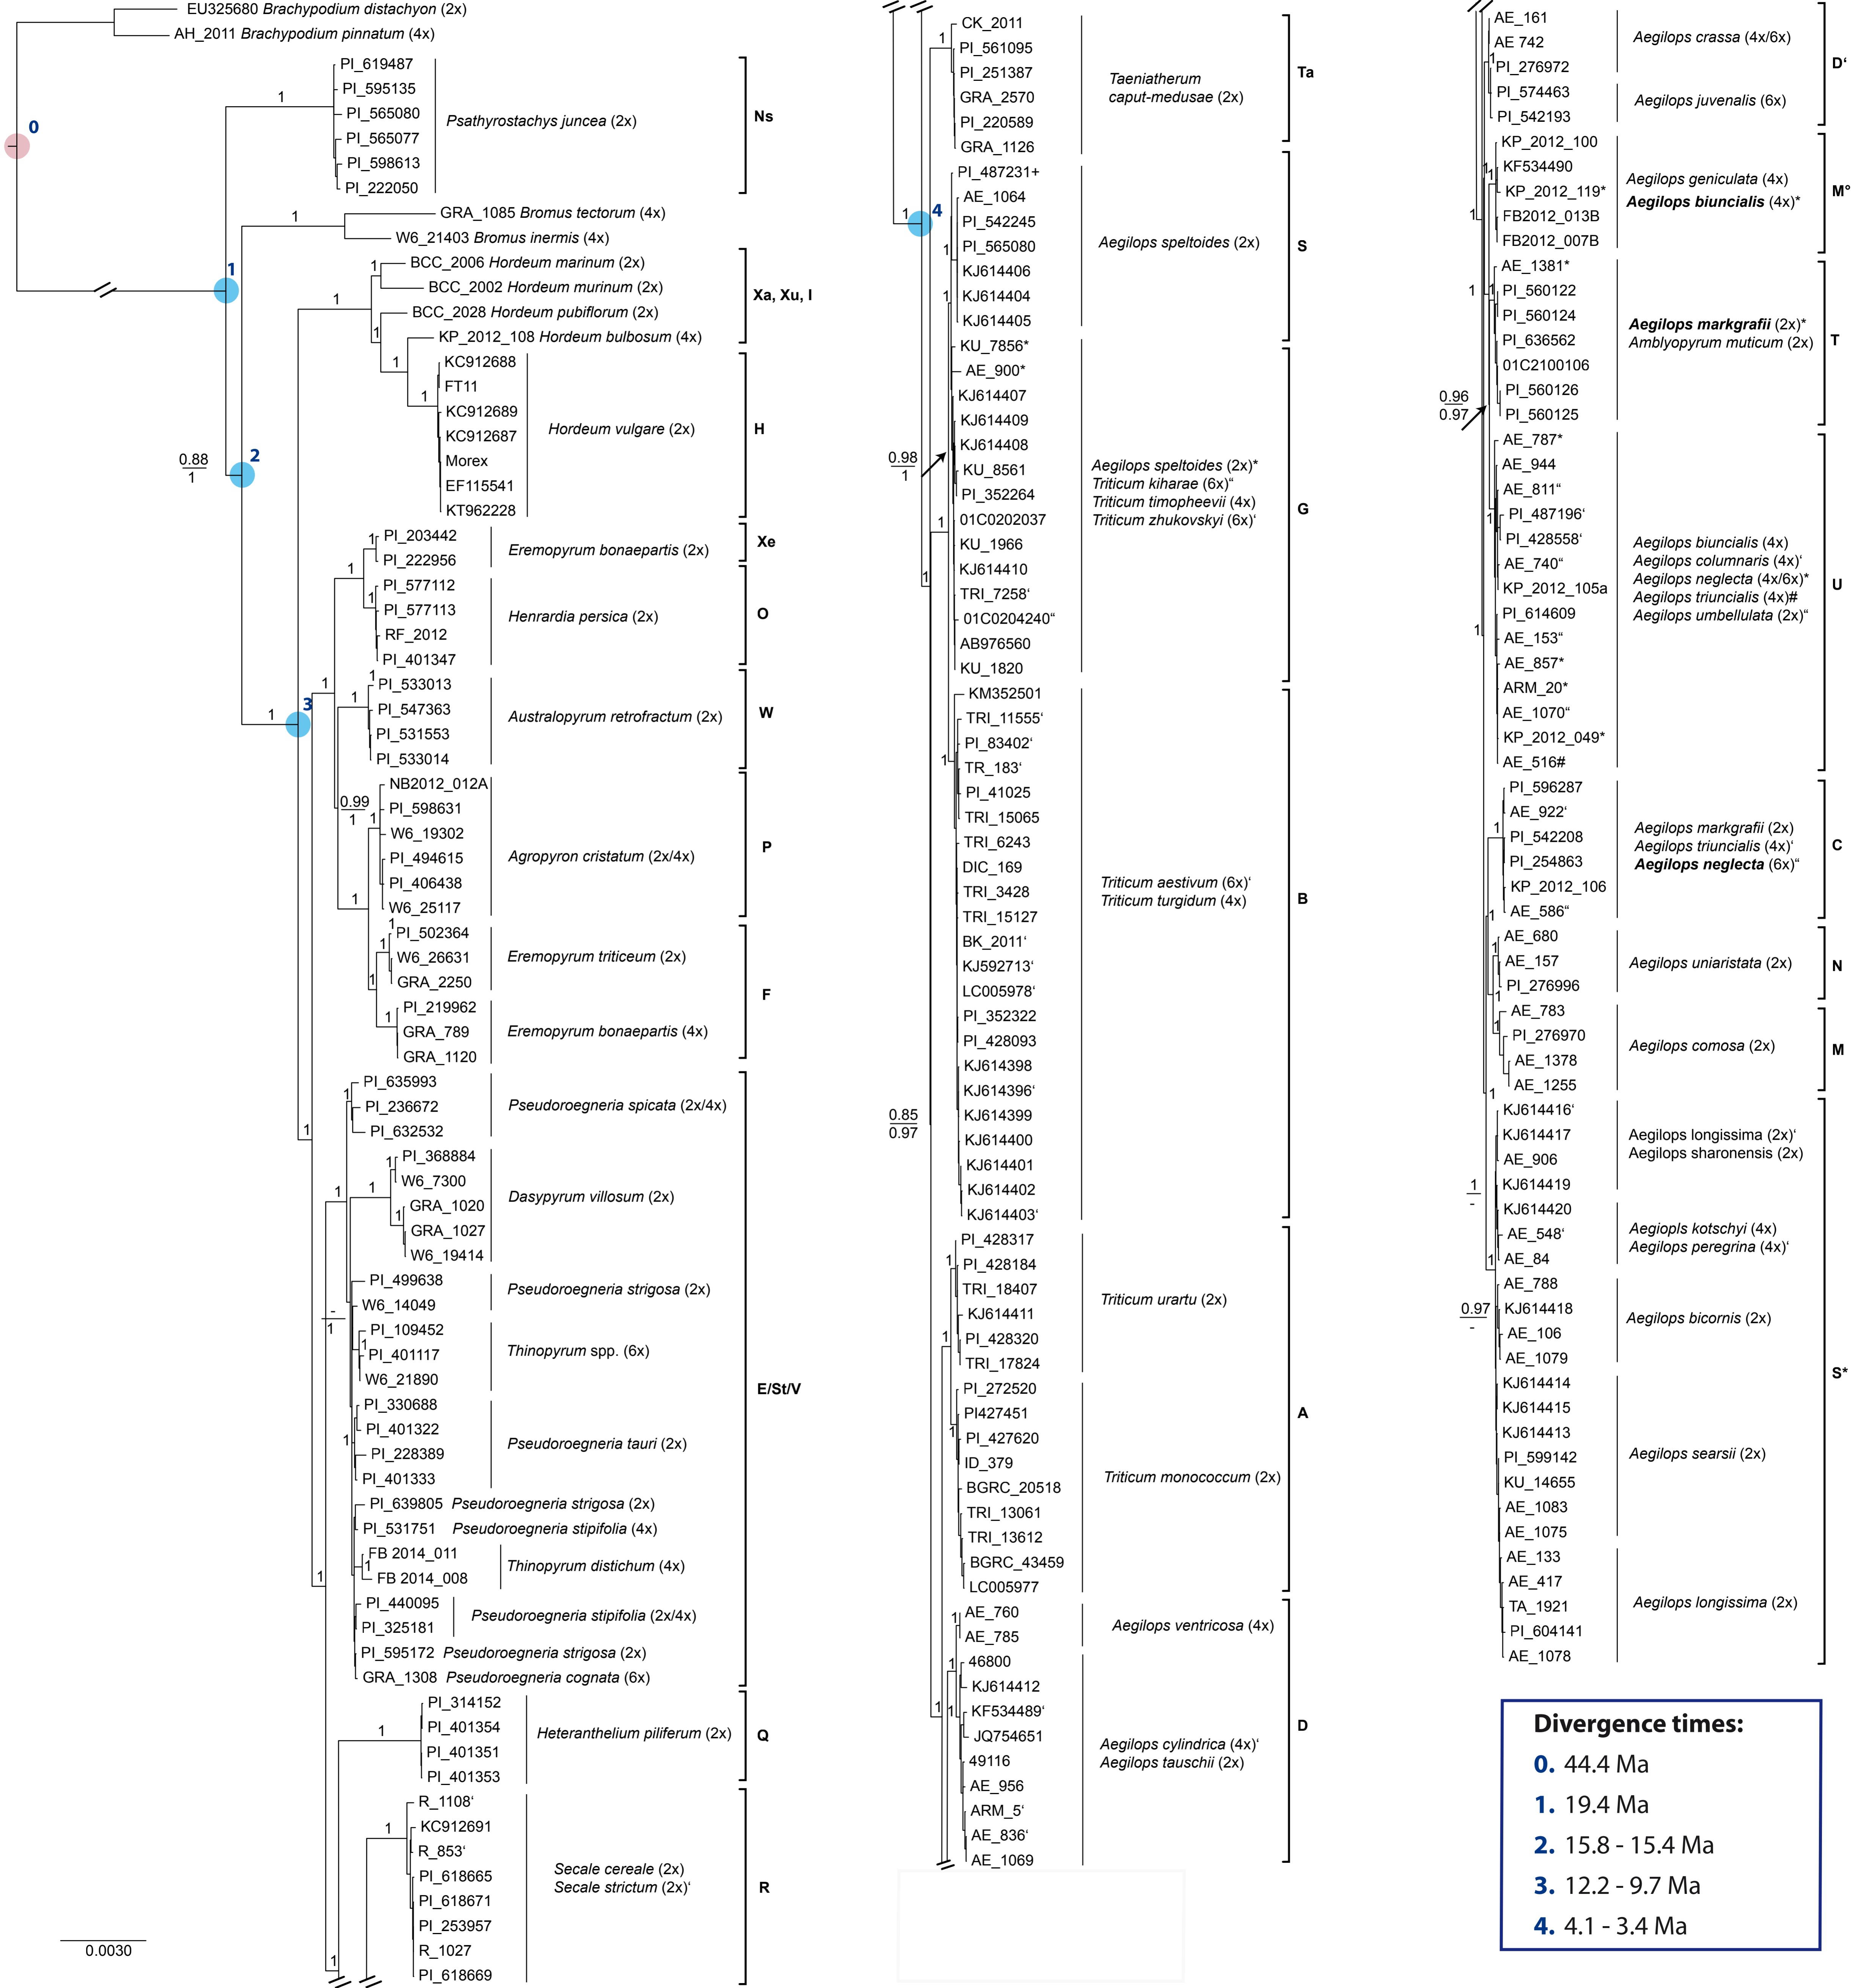

Supplement: 12862_2017_989_MOESM4_ESM.pdf [file 12862_2017_989_MOESM4_ESM.pdf]
